# Supplementary material for: Microwave-assisted ultraviolet digestion: an efficient method for the digestion of produced water from crude oil extraction and further metal determination
Source: Royal Society of Chemistry journal article supplement (doi:10.1039/c7ja00302a), 2017-01-01

### **SUPPLEMENTARY INFORMATION:**

1. Aspect of produced water sample "B" (A) without treatment, (B) after digestion by MW-AD and (C) after digestion by MW-UV.

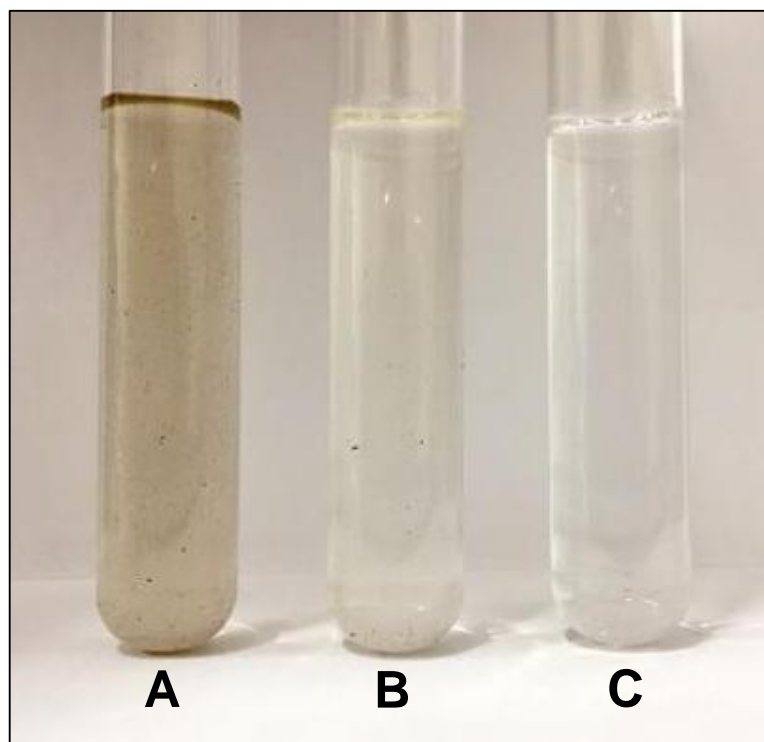

Supplement: c7ja00302a1.pdf [file c7ja00302a1.pdf]
